# Supplementary material for: Circulating Biomarkers of Fibrosis Formation in Patients with Arrhythmogenic Cardiomyopathy
Source: MDPI journal article supplement (doi:10.3390/biomedicines11030813), 2023-03-07
Supplement: s1 [file s1]

## Supplementary Materials

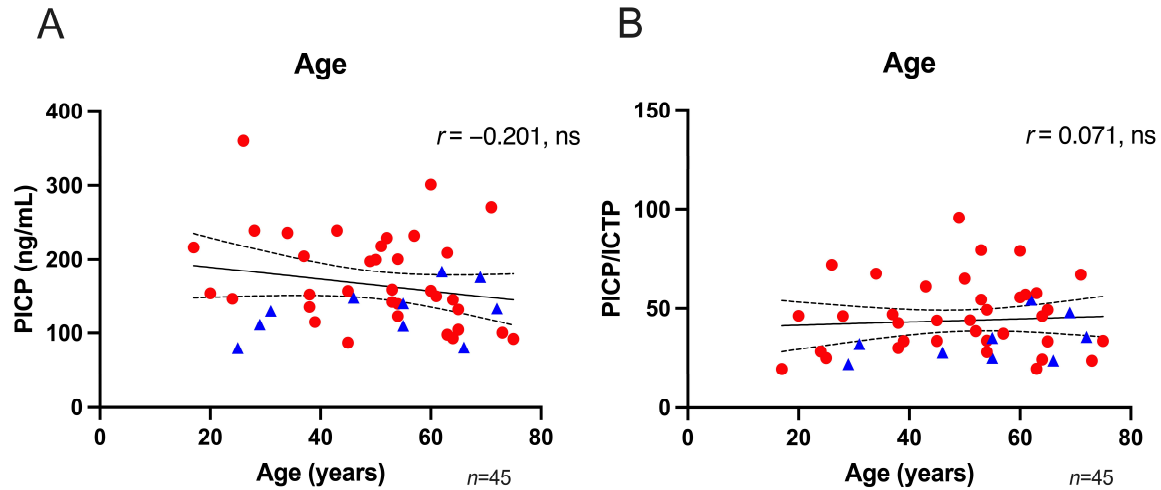

**Supplementary Figure S1.** No effect of age on biomarker levels. (A) A weak negative correlation of age with PICP levels was seen ( $n=45$ ). (B) No correlation of total collagen turnover and age was found ( $n=45$ ). Blue triangles represent preclinical variant carriers, while red dots are affected ACM patients. PICP; procollagen type I carboxy-terminal pro-peptide, ICTP; C-terminal telopeptide collagen type I,  $r$ ; Pearson correlation coefficient, ns; not significant. Pearson's correlation coefficient was performed.

A

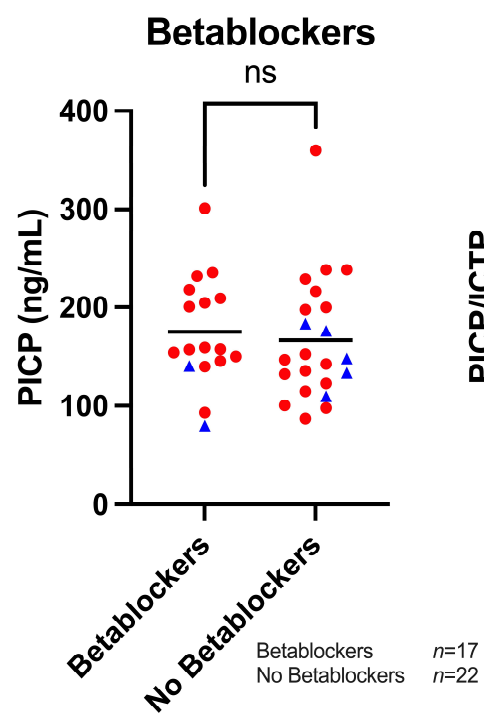

B

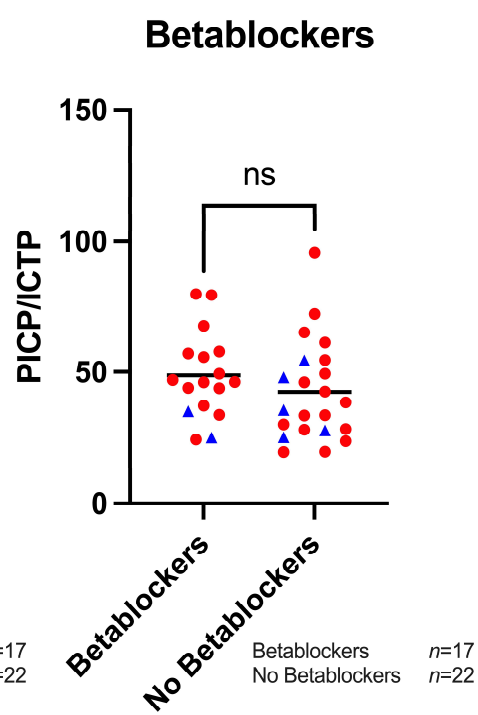

C

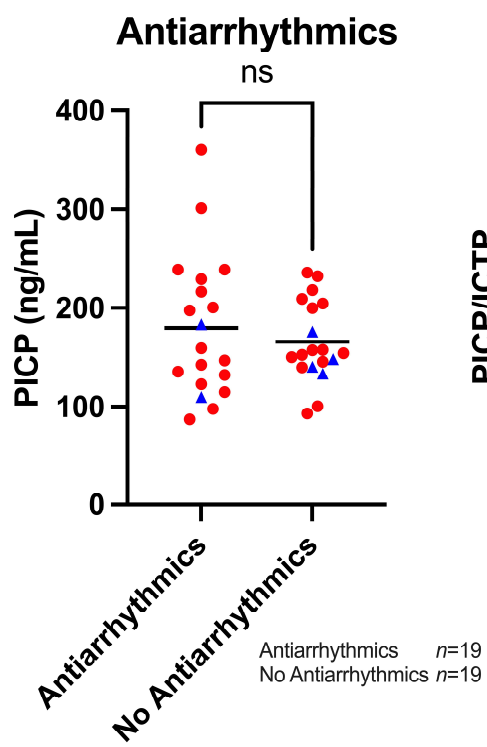

D

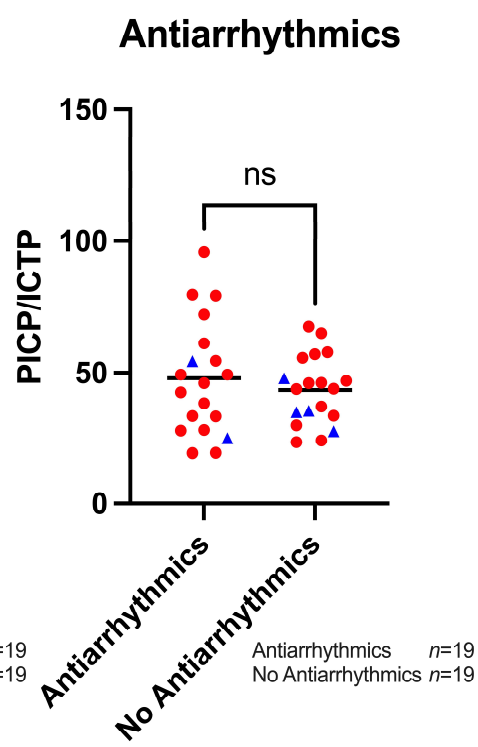

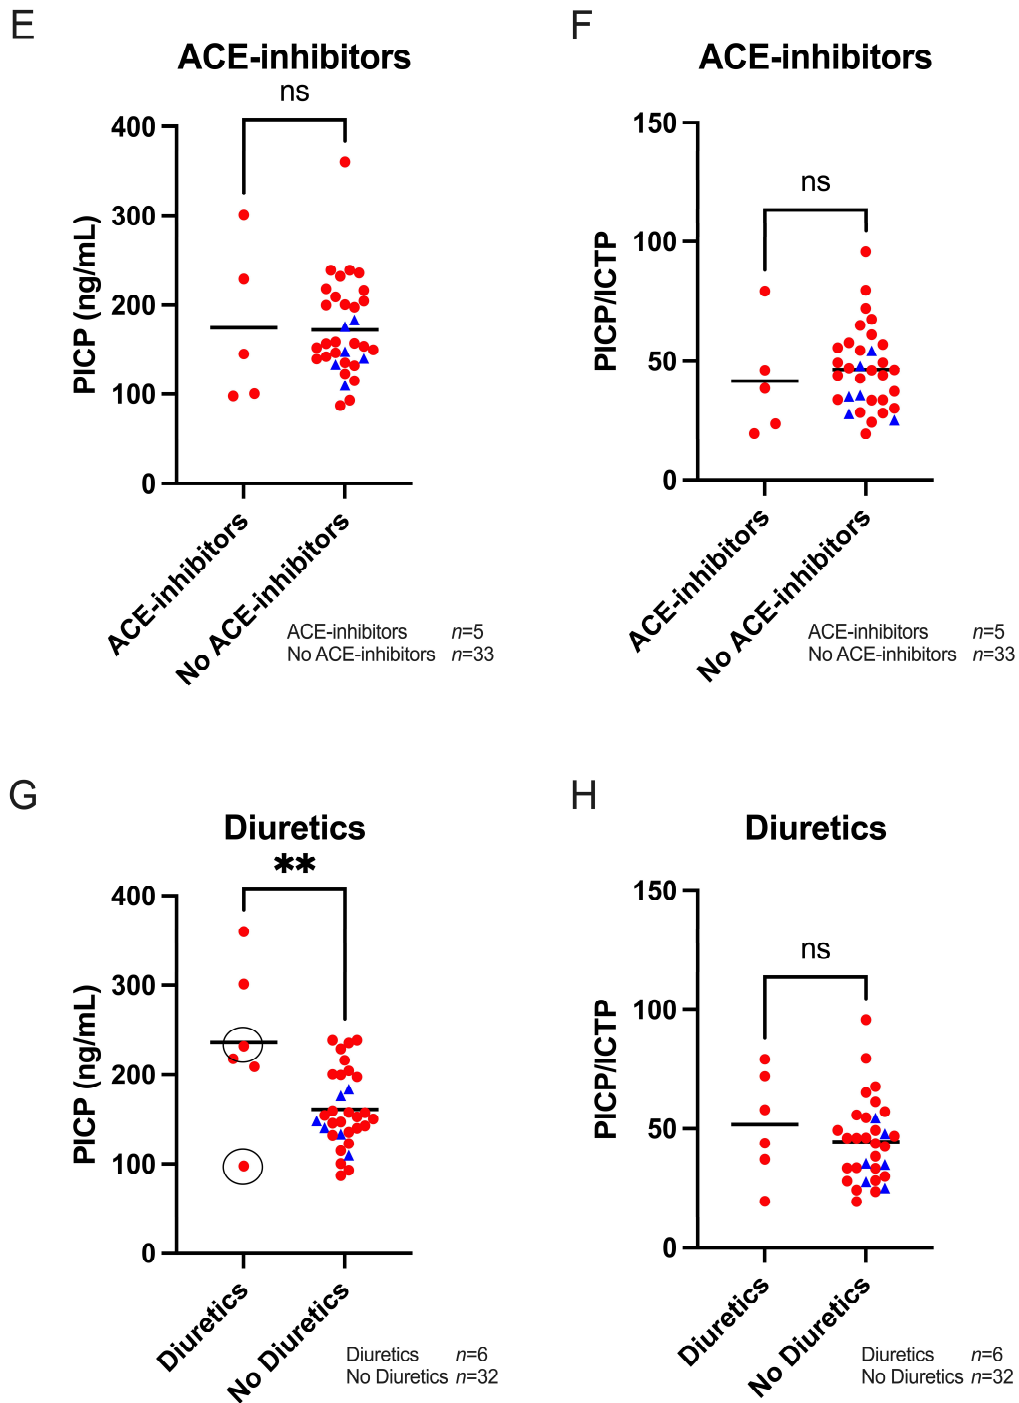

**Supplementary Figure S2.** Medication use did not influence fibrosis biomarker level. (A,B) The use of betablockers ( $n=17$ ) did not influence PICP and PICP/ICTP ratios compared to patients without betablockers ( $n=22$ ). (C,D) Fibrosis biomarker levels were not changed when using antiarrhythmics ( $n=19$  both groups). (E,F) Fibrosis biomarkers levels were similar between patients using ACE-inhibitors ( $n=5$ ) and patients without using ACE-inhibitors ( $n=33$ ). (G) Significant higher levels of PICP levels were found in patients using diuretics ( $n=6$ ). Marked patients correspond to patients using torasemid as diuretics. (H) Similar levels of total collagen turnover were found in patients with ( $n=6$ ) and without using diuretics ( $n=32$ ). Blue triangles represent preclinical variant carriers, while red dots are affected ACM patients. PICP; procollagen type I carboxy-terminal pro-peptide, ICTP; C-terminal telopeptide collagen type I, ACE; angiotensin-converting enzyme, ns; not significant. Unpaired Student's t test is performed.  $**p<0.01$ .

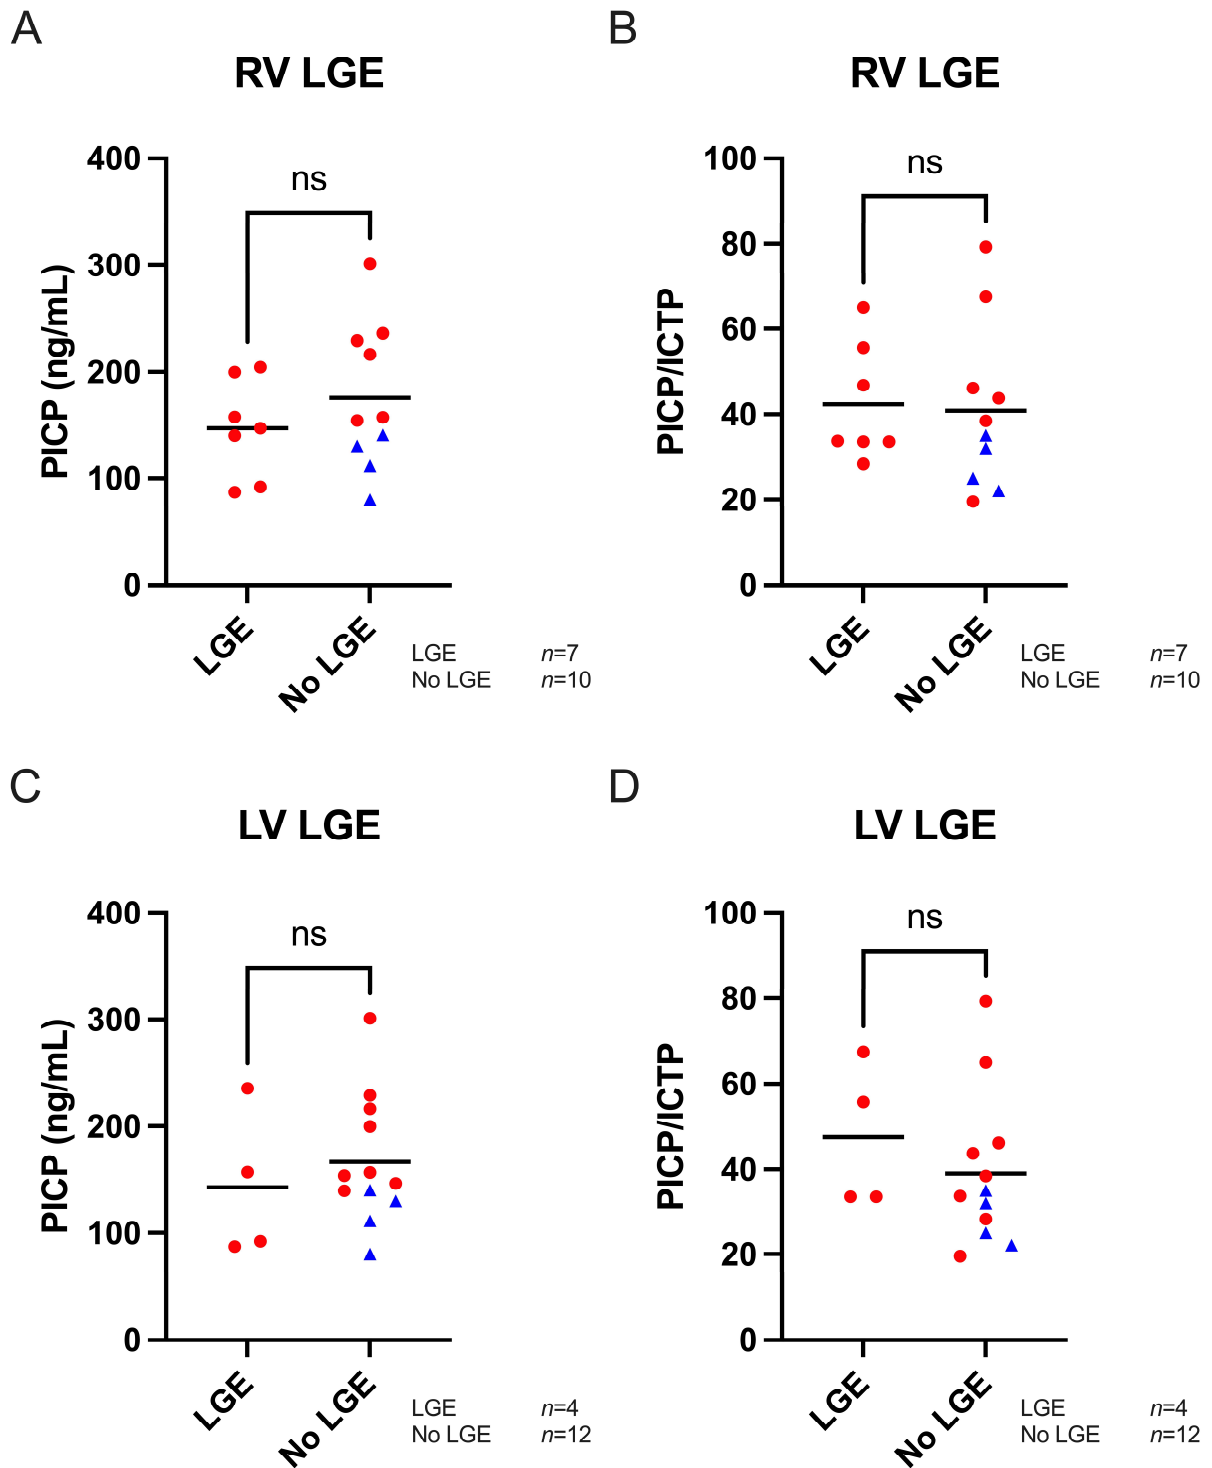

**Supplementary Figure S3.** No correlation with LGE and fibrosis biomarkers. (A,B) No difference in PICP levels or PICP/ICTP ratio in ACM patients with RV LGE ( $n=7$ ) compared to patients without RV LGE ( $n=10$ ). (C,D) No significant distinction was found between patients with LV LGE ( $n=4$ ) and patients without LV LGE ( $n=12$ ) and fibrosis biomarkers. Blue triangles represent preclinical variant carriers, while red dots are affected ACM patients. PICP; procollagen type I carboxy-terminal pro-peptide, ICTP; C-terminal telopeptide collagen type I, LGE; late gadolinium enhancement, RV; right ventricle, LV; left ventricle, ns; not significant. Unpaired Student's t test was performed.
